1 **Main Manuscript for**

2 *CircSry* regulates spermatogenesis by enhancing  $\gamma$ H2AX expression  
3 via sponging miR-138-5p

4 Yanze Song<sup>1,2,3</sup>, †, Min Chen<sup>4&</sup>, †, Yingfan Zhang<sup>5</sup>, Na Li<sup>1,2,3</sup>, Min Chen<sup>1,2,3&</sup>, Miaomiao Qiao<sup>1,2,3</sup>,  
5 Yuanwei Cao<sup>1,2,3</sup>, Jian Chen<sup>1,2,3</sup>, Fei Gao<sup>1,2,3\*</sup>, Haoyi Wang<sup>1,2,3,6,\*</sup>

6 <sup>1</sup>State Key Laboratory of Stem Cell and Reproductive Biology, Institute of Zoology, Chinese  
7 Academy of Sciences, Beijing, 100101, China

8 <sup>2</sup>University of Chinese Academy of Sciences, Beijing, 100049, China

9 <sup>3</sup>Institute for Stem Cell and Regeneration, Chinese Academy of Sciences, Beijing 100101,  
10 China

11 <sup>4</sup>Guangdong and Shenzhen Key Laboratory of Male Reproductive Medicine and Genetics,  
12 Institute of Urology, Peking University Shenzhen Hospital, Shenzhen Peking University-Hong  
13 Kong University of Science and Technology Medical Center, Shenzhen, Guangdong 518036,  
14 P.R. China.

15 <sup>5</sup>The Jackson Laboratory, Bar Harbor, Maine 04609, USA

16 <sup>6</sup>Lead Contact

17

18 **Correspondence to** : Haoyi Wang, wanghaoyi@ioz.ac.cn (H.Y.W)

19 † Joint Authors

20 & The same name for different person

21

22 **Keywords:** *circSry* spermatogenesis meiosis miR-138-5p  $\gamma$ H2AX

23

24

25

## 26 **Abstract**

27 *Sry* on the Y chromosome is the master switch in sex determination in mammals. It has been well  
28 established that *Sry* encodes a transcription factor that is transiently expressed in somatic cells of  
29 male gonad, inducing a series of events that lead to the formation of testes. In the testis of adult  
30 mice, *Sry* is expressed as a circular RNA (circRNA) transcript, a type of noncoding RNA that  
31 forms a covalently linked continuous loop. However, the physiological function of this *Sry* circRNA  
32 (*circSry*) remains unknown since its discovery in 1993. Here we show that *circSry* is mainly  
33 expressed in the spermatocytes, but not in mature sperms and Sertoli cells. Loss of *circSry* led to  
34 the reduction of sperm number and the defect of germ cell development. The expression of  
35  $\gamma$ H2AX was decreased and failure of XY body formation was noted in *circSry* KO germ cells.  
36 Further study demonstrates that *circSry* regulates H2AX mRNA indirectly in pachytene  
37 spermatocytes through sponging miR-138-5p. Our study demonstrates that, in addition to its well-  
38 known sex-determination function, *Sry* also plays important role in spermatogenesis as a circRNA.

## 39 **Introduction**

40 Long non-coding RNAs are relatively abundant in the mammalian transcriptome (1), and play  
41 important roles in gene regulation in development and reproduction (2). Circular RNA (circRNA) is  
42 a unique type of non-coding RNAs generated through back-splicing to form a covalently linked  
43 loop (3, 4). Since the first circular RNA was discovered in 1970s (5), very few circRNAs had been  
44 identified in the following years. In the last decade, however, the development of RNA  
45 sequencing technologies and bioinformatics has greatly facilitated the discovery of circular RNAs  
46 (6). Many circular RNAs were found stably expressed in various cell types, and engaged in  
47 regulating various biological processes, such as transcription, alternative splicing, chromatin  
48 looping, and post-transcriptional regulation (7-12). One of the functional mechanisms of circular  
49 RNA is that they act as competing endogenous RNAs (ceRNAs) to sponge miRNAs, therefore  
50 regulating gene expression (4, 13-15).

51 *Sry* is best known as the sex-determination gene on Y chromosome. In mouse, *Sry* is  
52 expressed as a transcription factor from 10.5 to 12.5 post-coitum (dpc) in the genital ridge  
53 somatic cells, initiating testis development (16). Introduction of *Sry* locus into the female mouse  
54 embryo switches the sex to male, while the targeted mutation in male embryos leads to complete  
55 male-to-female sex reversal (17-19). Moreover, mutation of *SRY* causes a range of sex-disorder  
56 development with profound effects in human (20). Recently, a cryptic second exon of mouse *Sry*  
57 hidden in the palindromic sequence was identified and this two-exon *Sry* transcript plays primary  
58 role in sex determination (21). *Sry* is also expressed in adult mouse testis as a circular RNA  
59 (*circSry*) (22-24). A linear transcript containing long inverted repeats is transcribed from a distal  
60 promoter, followed by a back splicing event that covalently links an acceptor splice site at the 5'  
61 end to a donor site at a downstream 3' end (Figure 1A) (4). Although the presence of *circSry* in  
62 the testis has long been discovered, the significance of *circSry* remains elusive.

63 In this study, we generated mouse models that did not express *circSry*, without interfering with  
64 male sex determination. We found that *circSry* played an important role in spermatogenesis, and  
65 further dissected the underlying mechanism. Our findings highlight a unique synergy between  
66 *Sry*'s male sex-determination role as a protein and its regulatory role as a circular RNA in male  
67 germ cells.

68

## 69 **Results**

70

### 71 **Characterization of *circSry* in mouse testis**

72 To identify *Sry* transcripts in adult mouse testis, divergent primers and convergent primers were  
73 designed to amplify *circSry* or *Sry* linear RNA respectively (Figure 1A). Upon RNase R treatment,  
74 *circSry* was still detectable by RT-PCR, while linear RNA was not (Figure 1B). The expression of  
75 *circSry* was abundant when random hexamer primers were used for reverse transcription, while  
76 only weak signal was detected using oligo (dt)<sub>18</sub> primers. In comparison, the expression of *Sry*  
77 linear RNA was barely detectable using either random hexamer primers or oligo (dt)<sub>18</sub> primers

78 (Figure 1C). The presence of head-to-tail splicing site of *circSry* was verified by Sanger  
 79 sequencing (Figure1 figure supplement 1A). Furthermore, by separating the cytoplasm and  
 80 nucleus fractions, we found that *circSry* was mainly localized in the cytoplasm (Figure figure  
 81 supplement 1B). All these results confirmed previous reports that *Sry* transcripts in adult mouse  
 82 testis are non-polyadenylated circular RNAs mainly localized in cytoplasm (24).

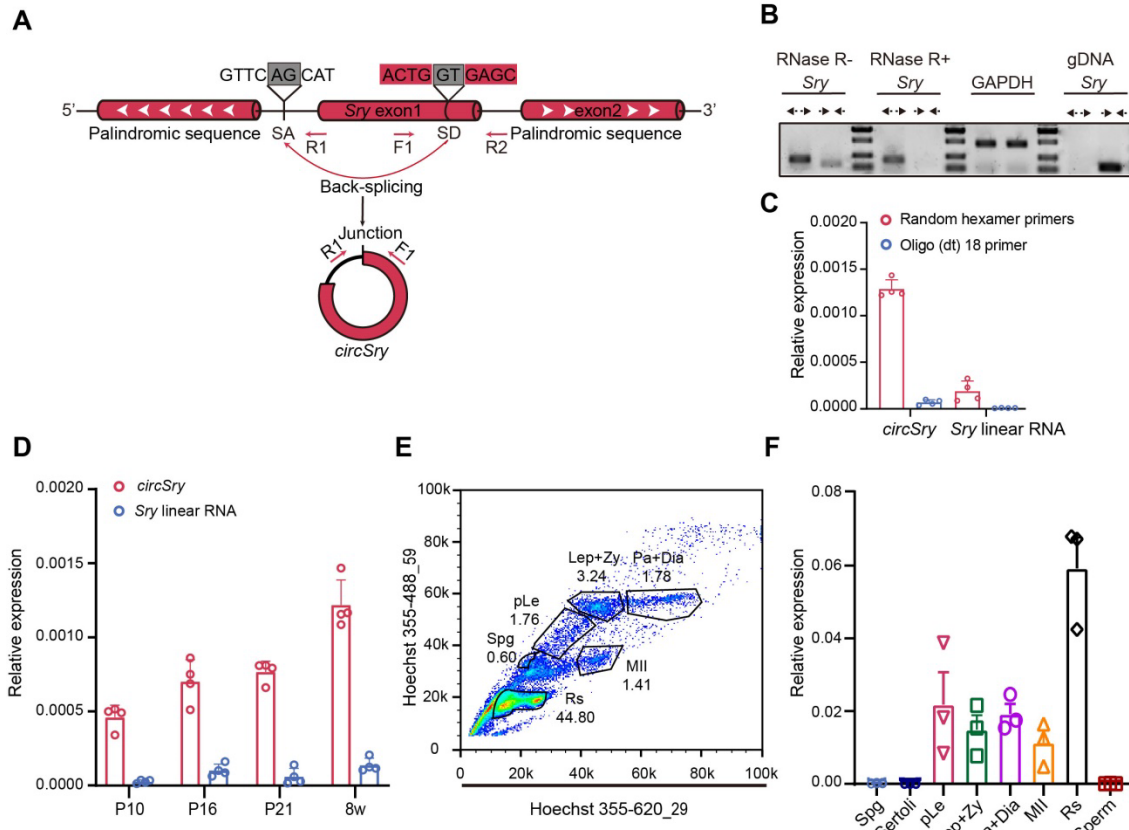

83  
 84 **Figure 1. Identification of *circSry*.** (A) Scheme illustrating the generation of *circSry*. *CircSry* is formed by an  
 85 incomplete single exon *Sry* gene through back splicing mechanism. Convergent or divergent primers detect *circSry* (F1  
 86 and R1) or linear RNA (F1 and R2) of *Sry*. Gray box indicates the head-to-tail splicing sequence. (B) Production of  
 87 divergent primers was resistant to RNase R treatment. *CircSry* was not amplified using genomic DNA as template (n=3);  
 88 GAPDH was used as control. (C) Random hexamer primer or Oligo (dt)<sub>18</sub> primers were used to analyze the expression  
 89 levels of *circSry* in 8 week-old control mice (n=4). (D) Relative expression of *circSry* or linear RNA in testis from 10 days  
 90 postnatal to adulthood (n=4). (E) Fluorescence cytometry separated different subtypes of germ cells in adult testis and (F)  
 91 relative expression of *circSry* in 8 types of cells. (Spg: spermatogonium; pLe: pre-leptotene stage; Lep+Zy: leptotene  
 92 stage and zygotene stage; Pa+Di: pachytene stage and diplotene stage; MII: meiosis II stage; Rs: round spermatids;  
 93 Sperm: mature sperm; Sertoli: Sertoli cells; n=3). The data are presented as the mean ± s.e.m. Source data is available  
 94 as a Source Data file.

95

96 Next, we measured the level of *Sry* transcription from day P8 to adulthood. The amount of  
97 *circSry* increased over time while linear RNA was barely detectable (Figure 1D). To examine the  
98 expression of *circSry* in different cell types of adult testes, different types of germ cells were  
99 isolated by flow cytometry (39): spermatogonia (Spg), Pre-leptotene spermatocytes (pLE),  
100 leptotene and zygotene spermatocytes (Lep+Zy), pachytene and diplotene (Pa+Di)  
101 spermatocytes and round spermatids (Figure 1E). Mature sperms were obtained from adult  
102 mouse epididymis and Sertoli cells were obtained from P20 testis. *CircSry* was detected in  
103 meiotic and post-meiotic germ cells, expressed at the highest level in round spermatids. There  
104 was no *circSry* detected in spermatogonia, mature sperms or Sertoli cells (Figure 1F).

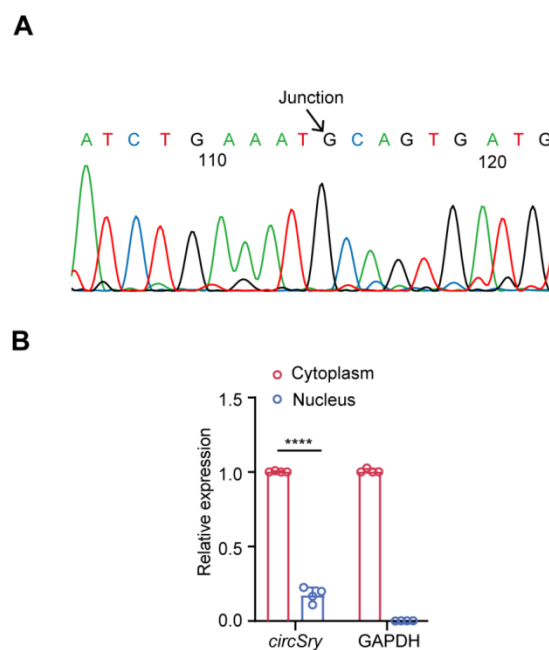

105

106 **Figure 1 figure supplement 1. Characterization of *circSry* in mouse testis (related to Figure 1).** (A) Splicing junction  
107 was confirmed by Sanger sequencing. The arrow indicated the head-to-tail splicing site of *circSry*. (B) qRT-PCR results of  
108 cytoplasm-nucleus distribution of *circSry* (\*\*\*\* $P < 0.0001$ ; unpaired two-tailed t test,  $n=4$ ). The data are presented as the  
109 mean  $\pm$  s.e.m.

### 110 **Generation of *circSry* KO mouse**

111 To determine whether *Sry* is involved in spermatogenesis, we generated *circSry* KO mouse via  
112 CRISPR/Cas9 (Figure 2A). We designed a sgRNA to specifically target splice acceptor site  
113 upstream of *Sry* coding region. Deletion of the 11 bp region harboring splice acceptor site led to

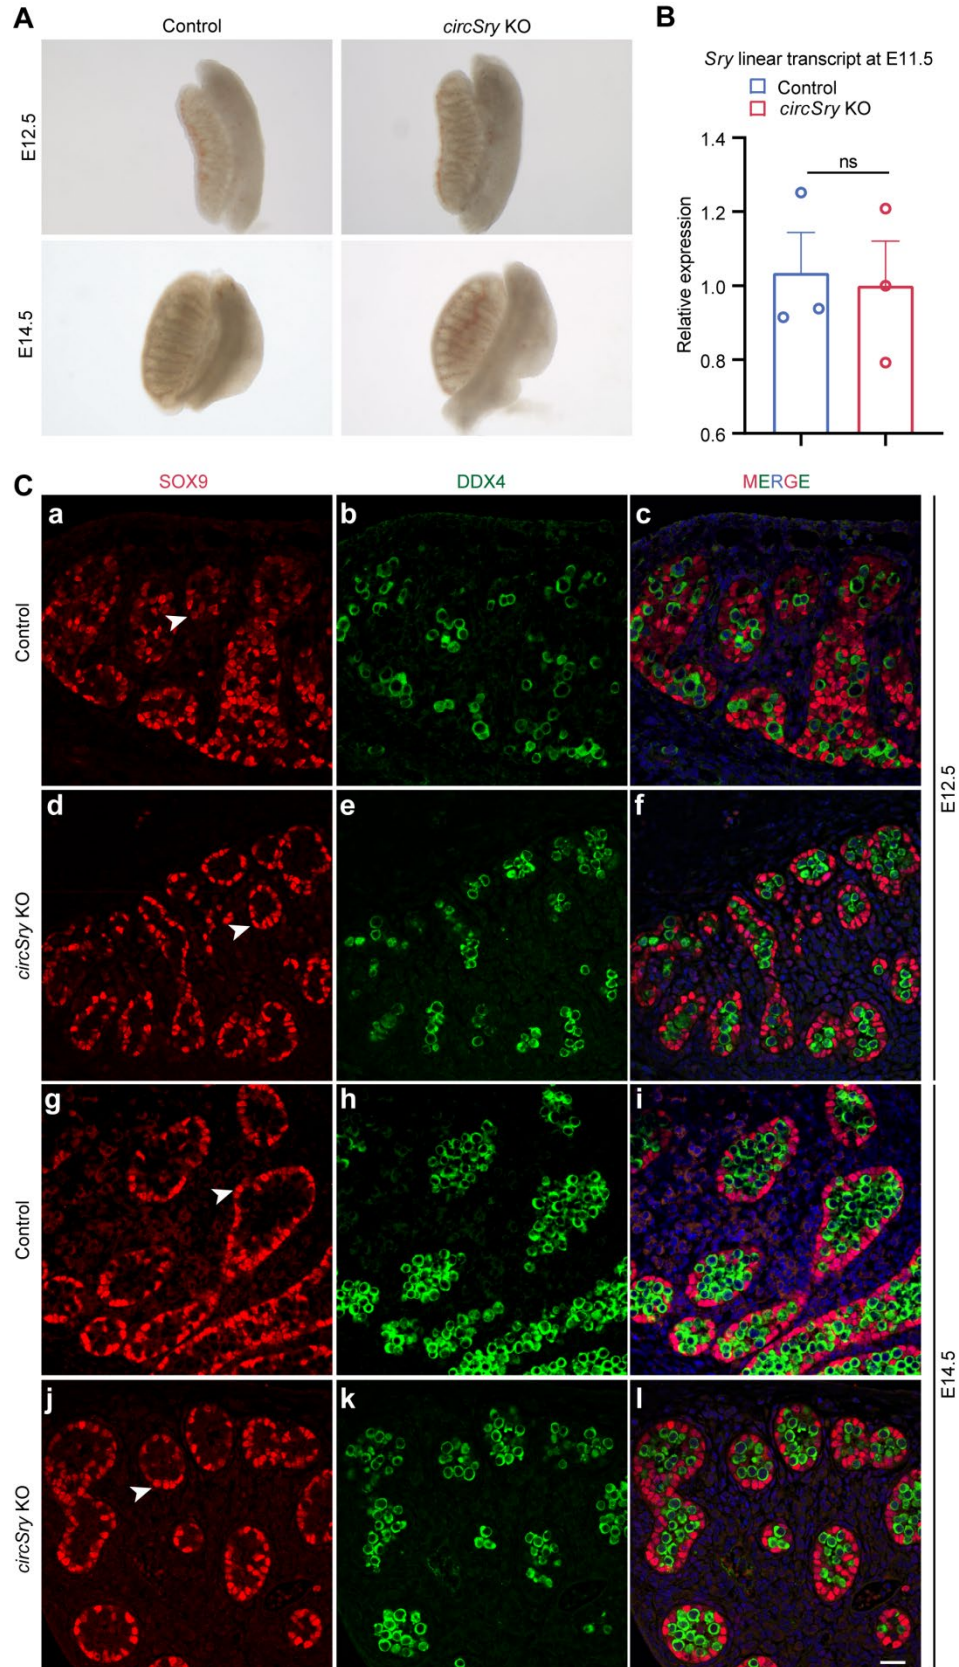

115 **Figure 2 figure supplement 1. No significant difference was detected in *circSry* KO embryos gonads (related to**  
116 **Figure 2).**(A) No significant difference was detected in control and *circSry* KO gonads morphology at E12.5 and E14.5 (B)  
117 Quantitative analyses of *Sry* gene in control and *circSry* KO gonads at E11.5. The mRNA expression level of *Sry* in  
118 control and *circSry* KO gonads was not significantly changed at E11.5. The gender of the embryos was confirmed with  
119 PCR using *Sry* primers. Data are presented as the mean  $\pm$  s.e.m; unpaired, two tailed t test, ns, not significant,  $p > 0.05$ .  
120 (C)SOX9 was expressed in Sertoli cells of both control and *circSry* KO gonads at E12.5 and E14.5. SOX9/DDX4 double-  
121 staining experiment was performed with control and *circSry* KO embryos at E12.5 (a-f) and E14.5 (g-l). Germ cells were  
122 labeled with DDX4 (green). DAPI (blue) was used to stain the nuclei. The arrowheads point to SOX9-positive Sertoli cells  
123 (red). The gender of the embryos was confirmed with PCR using *Sry* primers. Scale bars indicate 50  $\mu$ m.

124 complete loss of *circSry* (Figure 2, B and C). No significant difference was detected in control and  
125 *circSry* KO embryo gonads (Figure 2 figure supplement 1A-C). No gross abnormalities of external  
126 genitalia were observed in 8-week-old *circSry* KO (XY) male founder mice (Figure 2 figure  
127 supplement 2A), and they were fertile. In F0 and F1 generation, all the male mice carried Y  
128 chromosome and all the females did not, these results demonstrated that this deletion of 11bp  
129 upstream region of *Sry* did not interfere with sex determination (Figure 2 figure supplement 2B).  
130 Female offsprings were normal, and no developmental defects were observed (Figure 2 figure  
131 supplement 2A).

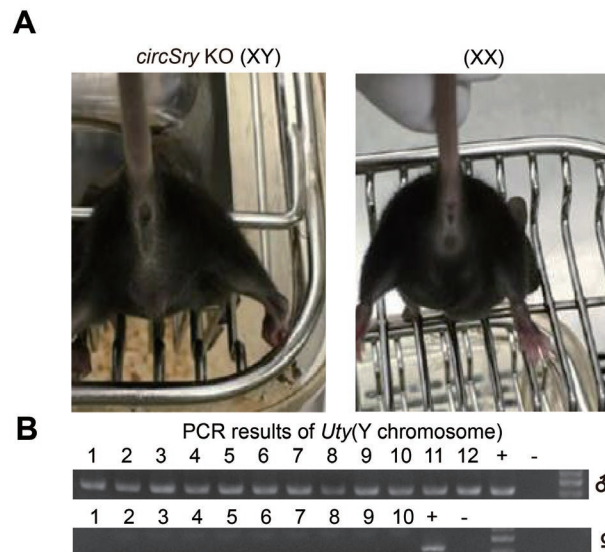

132

133 **Figure 2 figure supplement 2. *CircSry* KO mouse develop as male (related to Figure 2).** (A) F1 offsprings of *circSry*  
134 KO developed as male, and offspring XX mice exhibit normal female external genitalia and mammary glands. (B) PCR  
135 results of gender identification of F1 off springs. Y chromosomal gene *Uty* was detected by PCR.

136

137 **The fertility of *circSry* KO male mice was affected**

138 To determine the function of *circSry*, we assessed the testes of 6 to 10 week-old males and  
139 examined the germ cell development in *circSry* KO mice. The size of testes from *circSry* KO mice  
140 was smaller than that of control (wild-type C57BL/6) mice at 8 weeks (Figure 2D). The testis to  
141 body weight ratio of *circSry* KO mice was comparable to that of control mice at 7 weeks, whereas  
142 it became significantly lower from 8 to 10 weeks (Figure 2E). The development of germ cells was  
143 examined by MVH staining. As shown in Figure 2F, the histology of the seminiferous tubules was  
144 grossly normal. MVH-positive germ cells were detected in the testes of both control and *circSry*  
145 KO mice at 8 weeks (Figure 2F). However, the lumen size of seminiferous tubules in *circSry* KO  
146 mice was larger compared with that of control mice (Figure 2F). There were notably more  
147 TUNEL-positive apoptotic cells in the seminiferous tubules of *circSry* KO mice than that of control  
148 mice (Figure 2, G and H). Furthermore, we found that the total number of sperms in the caudal  
149 epididymis of *circSry* KO mice was lower than that in control mice (Figure 2I). To test the fertility  
150 of *circSry* KO mice, we crossed 2-3 month-old *circSry* KO male with wild-type female mice and  
151 counted the litter size born within 4 months. *CircSry* KO mice produced smaller litter size than  
152 age-matched control male mice (Figure 2J). Notably, no difference of SOX9 positive Sertoli cells  
153 was detected between control and *circSry* KO seminiferous tubules (Figure 2 figure supplement 3,  
154 A and B), suggesting that Sertoli cells were not affected. In addition, the percentage of mobile  
155 sperm remained no difference between the control and the *circSry* KO mice (Figure 2 figure  
156 supplement 3C), indicating that the loss of *circSry* did not affect sperm mobility. Taken together,  
157 these results suggested that the germ cell development was abnormal in *circSry* KO mice.



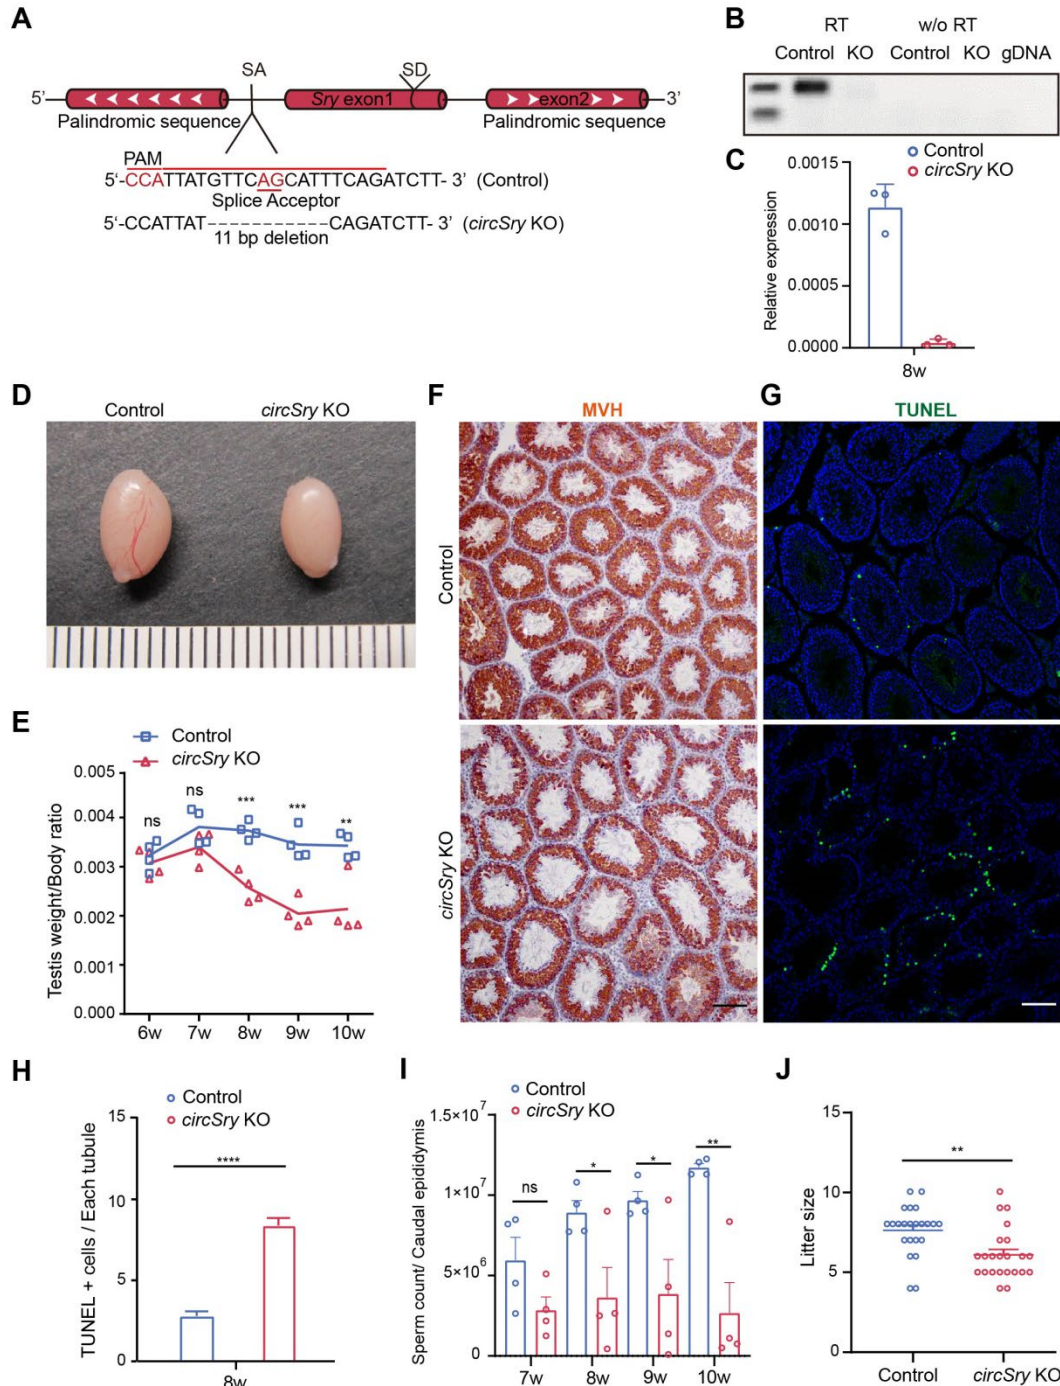

158  
159

**Figure 2 Loss of *circSry* impairs male mice fertility.** (A) Design of deleting *circSry* using CRISPR/Cas9; a specific sgRNA was designed to target splicing acceptor site of *circSry*. (B) RT-PCR results of *circSry*. (C) Quantification of *circSry* within control or *circSry* KO mice testes. (D) Representative image of *circSry* KO and control (wild-type) testis of 8-week-old mice. (E) Testis/body ratio of *circSry* KO and control mice from 6 to 10 weeks of age. P values are presented above the relevant bars (\* $p < 0.05$ , \*\* $p < 0.01$ , \*\*\* $p < 0.001$ , ns, not significant; unpaired, two tailed t test,  $n = 4$ ). (F) Germ cells were labeled with antibody against MVH (brown). Loss of epithelium within the seminiferous tubules in *circSry* KO compared with control mice. Scale bars indicate 100  $\mu\text{m}$ . (G), (H) TUNEL signal in *circSry* KO and control mouse testis. The total

166 tubule number reached 200 (\*\*\*\* $p < 0.0001$ ; unpaired, two tailed t test). (I) Sperm count of *circSry* KO mice and control  
167 mice from 7 to 10 weeks of age (\* $p < 0.05$ , \*\* $p < 0.01$ , ns, not significant; unpaired, two tailed t test  $n = 5$ ). (J) Litter size of  
168 *circSry* KO compared with control mice. Random 8-week-old males of control and *circSry* KO were chosen to breed with  
169 6-week-old female of C57BL/6 for 4 months (\*\* $p < 0.01$ , unpaired, two tailed t test;  $n = 4$ ). Scale bars indicate 100  $\mu\text{m}$ . The  
170 data are presented as the mean  $\pm$  s.e.m.

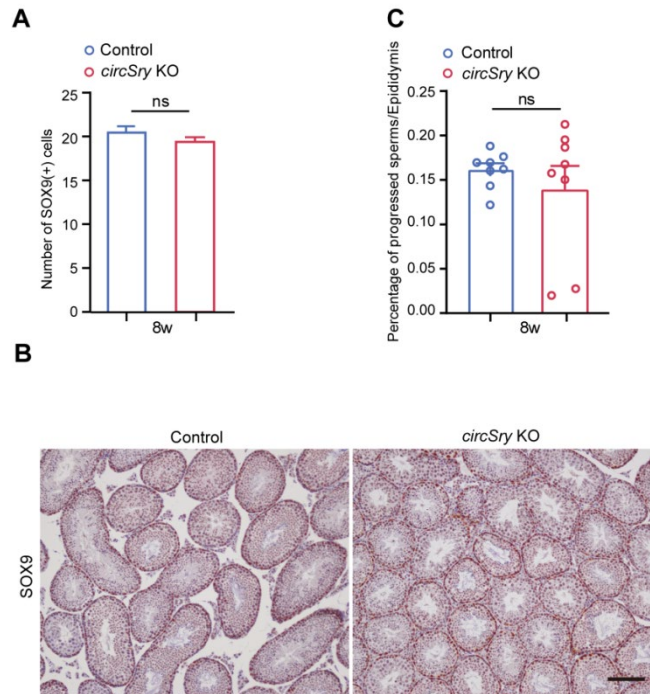

171  
172

173 **Figure 2 figure supplement 3. Immunohistochemical staining of SOX9 and sperm motility analysis in control and**  
174 ***circSry* KO mice (related to Figure 2).** (A) Quantification of progressed sperm obtained from epididymis between *circSry*  
175 KO and control mice. (ns, not significant; unpaired, two tailed t test,  $n = 8$ ). Sperms were collected from 8-week old *circSry*  
176 KO or control mice epididymis. (B) Representative image of Immunofluorescence staining of SOX9 in 8-week old control  
177 and *circSry* KO mice testes. Scale bars indicate 50  $\mu\text{m}$ . (C) Quantification of SOX9 positive cells within seminiferous  
178 tubules from 8-week old control and *circSry* KO mice (ns, not significant; unpaired, two tailed t test, control,  $n = 30$ ; *circSry*  
179 KO,  $n = 30$ ). The data are presented as the mean  $\pm$  s.e.m.

180

### 181 Germ cell specific knockout of *circSry* led to the defects of spermatogenesis

182 To characterize the cell type specific function of *circSry* in spermatogenesis more rigorously, we  
183 generated a *Sry* conditional KO mouse model *Sry*<sup>lox</sup> by inserting two loxP sites flanking *Sry*  
184 (Figure 3 figure supplement 1A). *CircSry* was specifically knocked out in germ cells or Sertoli cells

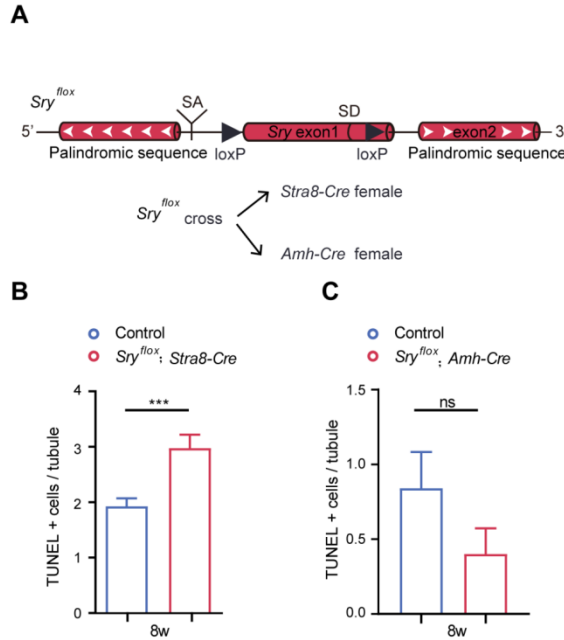

185  
186

187 **Figure 3 figure supplement 1. Conditional knockout of *Sry* (related to Figure 3).** (A) Schema of inserting loxP  
188 sequences into *Sry* locus. *Sry*<sup>flox</sup> was mated with *Stra8-Cre* female or *Amh-Cre* female to generate conditional knockout  
189 mice in germ cells or Sertoli cells, respectively. (B and C) Quantification of apoptotic cells in *Sry*<sup>flox</sup>; *Stra8-Cre* or *Sry*<sup>flox</sup>;  
190 *Amh-Cre* mice testis seminiferous tubules. The total number of calculated tubules reached 150. (\*\*\*)p<0.001; unpaired,  
191 two tailed t test; ns, not significant). The data are presented as the mean ± s.e.m.

192 by crossing *Sry*<sup>flox</sup> male mice with *Stra8-Cre* or *Amh-Cre* transgenic mice respectively (Figure 3  
193 figure supplement 1A). Compared with control mice, the testes size and the testis to body weight  
194 ratio of *Sry*<sup>flox</sup>; *Stra8-Cre* male was smaller at 2 months of age, and the number of sperms in the  
195 caudal epididymis was reduced (Figure 3, A and B). Accordingly, decreased MVH-positive germ  
196 cells and increased number of apoptotic germ cells were observed in *Sry*<sup>flox</sup>; *Stra8-Cre* mice  
197 (Figure 3, E and F, Figure 3 figure supplement 1B). These defects were similar to that observed  
198 in the *circSry* KO mice. By contrast, no defect of germ cell development was observed in *Sry*<sup>flox</sup>;  
199 *Amh-Cre* male mice (Figure 3, C and D, G and H, Figure 3 figure supplement 1C), indicating that  
200 *Sry* is not required for Sertoli cells function in adult male testis. Taken together, we conclude that  
201 *circSry* plays an important role in germ cell development during spermatogenesis.

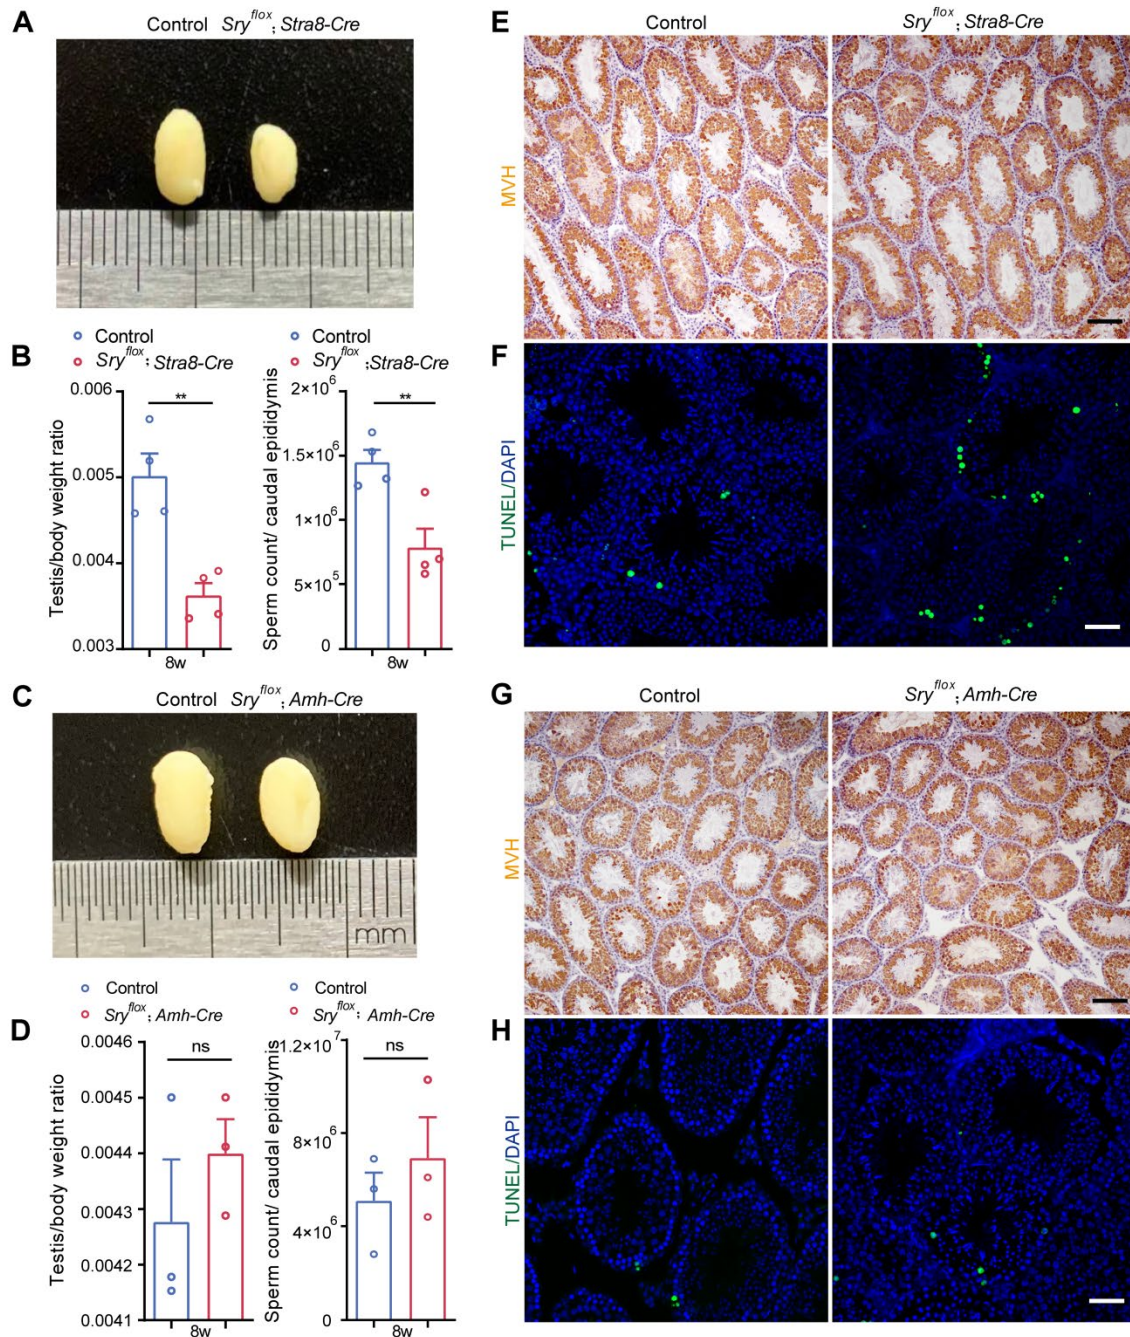

202  
 203 **Figure 3. Conditional knockout of *Sry*.** (A and C) Representative image of 8 weeks testis from  $Sry^{flox}; Stra8-Cre$  or  
 204  $Sry^{flox}; Amh-Cre$  (right) compared with control mice (left) from the same litter. (B and D) Testis/body ratio and sperm count  
 205 of  $Sry^{flox}; Stra8-Cre$  or  $Sry^{flox}; Amh-Cre$  compared with control mice from same litter. (\*\* $p < 0.01$ ; unpaired, two tailed t test,  
 206  $n = 4$ ). (E and G) Germ cells were labeled with antibody against MVH. Loss of epithelium within the seminiferous tubules in  
 207  $Sry^{flox}; Stra8-Cre$  or  $Sry^{flox}; Amh-Cre$  (left) compared with control mice (right). Scale bars indicate 100  $\mu m$ . (F and H) TUNEL  
 208 assay in  $Sry^{flox}; Stra8-Cre$  or  $Sry^{flox}; Amh-Cre$  (left) and control mice (right) testis seminiferous tubules. Scale bars indicate  
 209 50  $\mu m$ . The data are presented as the mean  $\pm$  s.e.m. Source data is available as a Source Data file.

210 **Loss of *circSry* caused reduction of primary spermatocytes during spermatogenesis**

211 To further characterize the defects of spermatogenesis in *circSry* KO mice, we examined the  
212 expression of meiosis-associated genes by immunofluorescence (IF). PLZF positive and STRA8  
213 positive germ cells were localized at the periphery of seminiferous tubules, and no difference was  
214 detected in the number of either PLZF positive or STRA8 positive germ cells between control and  
215 *circSry* KO testes (Figure 4 figure supplement 1, A and B). Notably, the number of SYCP3-

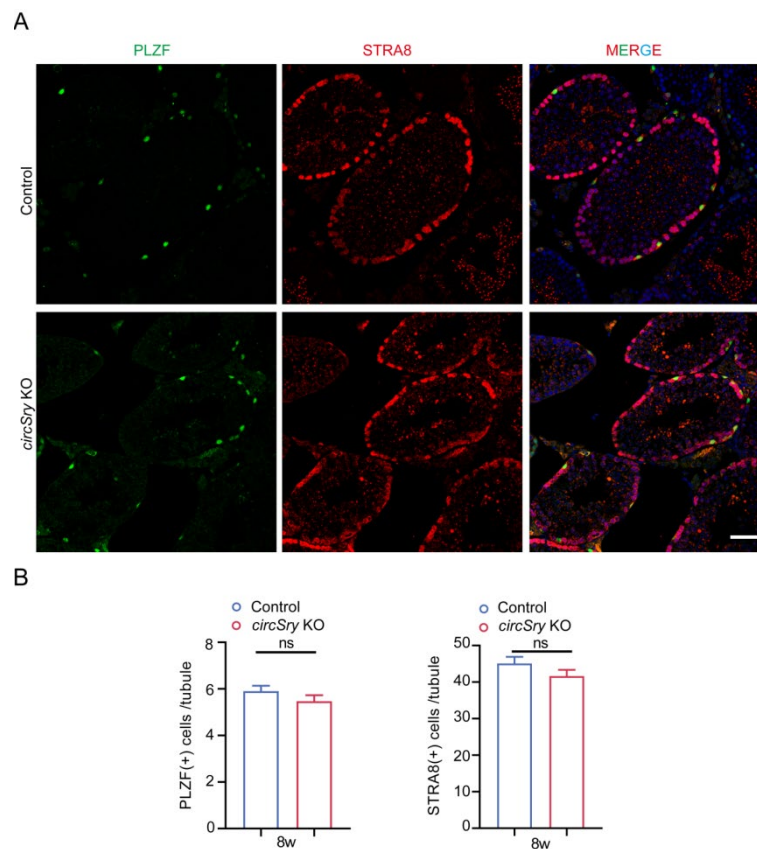

216  
217

218 **Figure 4 figure supplement 1. Immunofluorescence co-staining PLZF and STRA8 of control and *circSry* KO testes**  
219 **(related to Figure 4).** (A) Representative image of Immunofluorescence staining of PLZF (green) and STRA8 (red) in 8-  
220 week old control and *circSry* KO mice testes. Scale bars indicate 50  $\mu$ m. (B) Quantification of the number of PLZF positive  
221 cells (left) and STRA8 positive cells (right) within seminiferous tubules from three independent mice of 8-week old control  
222 and *circSry* KO mice (ns, not significant; unpaired, two tailed t test, control, n=30; *circSry* KO, n=30). The data are  
223 presented as the mean  $\pm$  s.e.m.  
224 positive germ cells in the seminiferous tubules of *circSry* KO mice was reduced compared with  
225 that in control mice (Figure 4, A and B). To assess the progression of spermatogenesis, flow

226 cytometry was used to analyze the proportion of cells with different ploidy levels in 2 month-old  
227 testes. The proportion of 4n cells was reduced in *circSry* KO mice, while no difference was noted  
228 in the proportion of diploid cells between control and the *circSry* KO mice (Figure 4C). Moreover,  
229 TUNEL and SYCP3 double positive germ cells were observed in the *circSry* KO seminiferous  
230 tubules, but not in control mice (Figure 4D, a to h). These results suggest that lack of *circSry*  
231 leads to defects in meiosis.

232 Since it has been reported that loss of histone  $\gamma$ H2AX resulted in aberrant synapsis of sex  
233 chromosomes during pachynema, which led to meiotic arrest and apoptosis (25, 26), we  
234 conducted chromosome spread experiment of spermatocytes with immunostaining of SYCP3  
235 and  $\gamma$ H2AX. As shown in Figure 4G,  $\gamma$ H2AX expression were decreased in 90% of pachytene  
236 stage of *circSry* KO nucleus (n=20) (Figure 4G). To further assess the X-Y synapsis during early  
237 pachynema, immunofluorescence staining of SYCP1 and SYCP3 was performed with  
238 chromosome spread. In 15.3% of *circSry* KO nucleus (n=300), we observed that X and Y  
239 chromosomes paired but not synapsed (Figure 4H). These abnormalities observed in *circSry* KO  
240 germ cells were similar with that in *H2ax*<sup>-/-</sup> germ cells, which led to genomic instability and cell  
241 apoptosis (26). Indeed, we observed a significant increase of number of germ cells in pachytene  
242 stage and decrease in number of diplotene stage cells (Figure 4I). In contrast, the number of  
243 germ cells at leptotene and zygotene stages appeared normal (Figure 4I and Figure 4 figure  
244 supplement 3), suggesting that *circSry* functions specifically in pachytene stage.

245 Failure of XY body formation usually abolishes Meiotic sex chromosome inactivation (MSCI) and  
246 increases the expression of X-linked and Y-linked genes in spermatocyte (25). To evaluate  
247 whether the deficiency of *circSry* impacted MSCI, we calculated the average value of gene  
248 expression from individual chromosomes based on our RNA-seq analysis in *circSry* KO versus  
249 control. The average value of all autosomal genes expression was 1.04 (Figure 4 figure  
250 supplement 3D), showed that the genes expression level of all autosome chromosomes from  
251 *circSry* KO spermatocytes was not different from control. However, the average values of X and  
252 Y-linked genes were 1.93 and 2.15, respectively (Figure 4 figure supplement 3D). These data

253 indicated that *circSry* deficiency resulted in the failure of inactivating some of the sex  
 254 chromosome-linked genes in *circSry* KO spermatocytes. In particular, X-linked genes *Rbbp7*,  
 255 *Pgk1* (27, 28), and Y-linked gene *Eif2s3y*, known to be subjected to MSCI (25, 29), were up  
 256 regulated in *circSry* KO spermatocytes, whereas the expression of autosome genes *Xpo6* and  
 257 *Dhrs1* were not affected (Figure 4 figure supplement 3E). Taken together, we conclude that the  
 258 loss of *circSry* impairs MSCI.

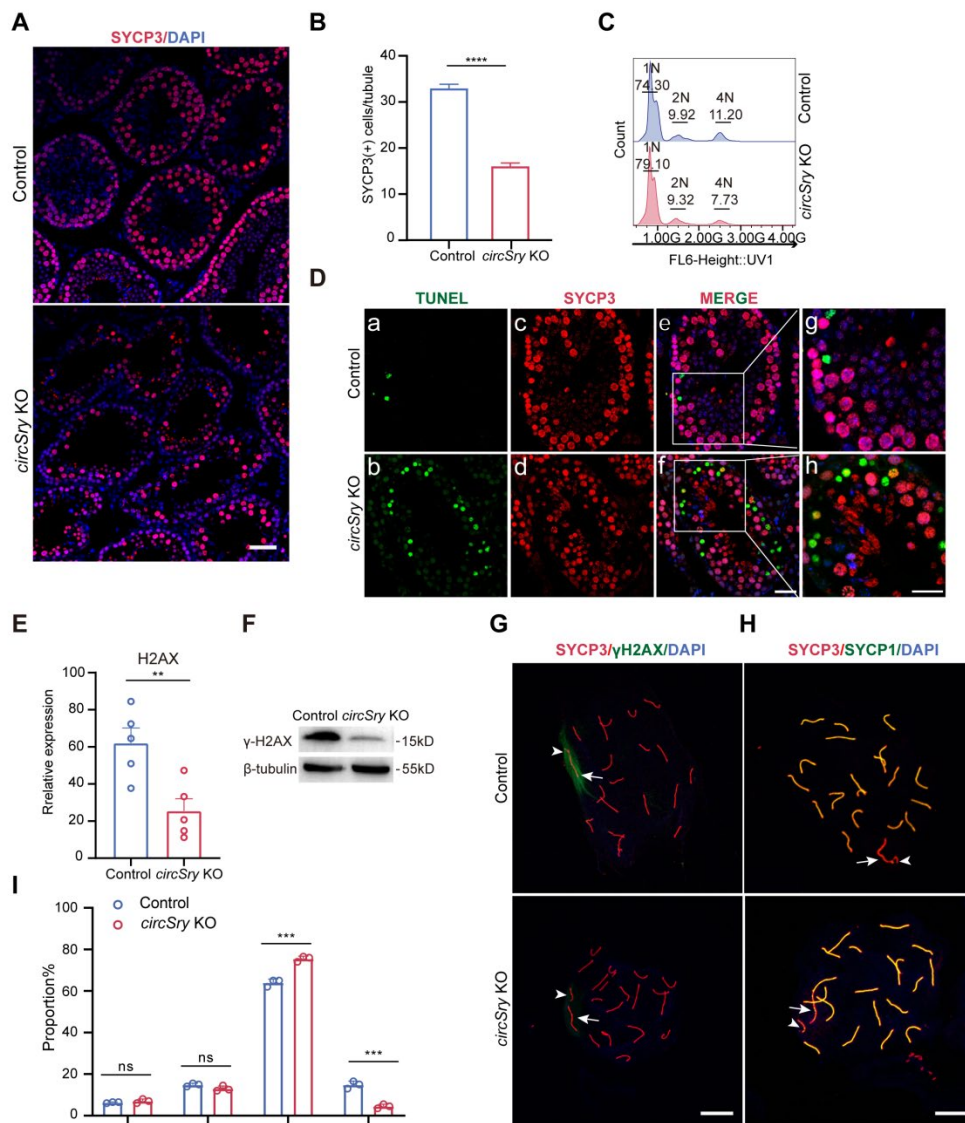

259  
 260  
 261  
 262

**Figure 4. Loss of *circSry* leads to decreased number and meiotic arrest in primary spermatocytes.** (A) Immunofluorescence staining of SYCP3 in seminiferous tubules of *circSry* KO (down) and control mice (up). Scale bars indicate 50µm. (B) Quantification of SYCP3 positive cells within seminiferous tubules from *circSry* KO compared with

263 control mice (\*\*\*\* $p < 0.0001$ ; unpaired, two tailed t test,  $n=70$ ). (C) Flow cytometry analysis of proportion of 4n cells, 1n  
 264 cells and 2n cells in 8-weeks mice testes between control and *circSry* KO mice( $n=3$ ). (D) (a to h)Representative image of  
 265 Immunofluorescence co-staining of TUNEL signal (green) and SYCP3 (red) in 9-week old control or *circSry* KO mice  
 266 testes.(a to f Scale bars indicate 50  $\mu\text{m}$ ; g, h Scale bars indicate 25  $\mu\text{m}$ ). (E) Expression of H2AX mRNA in control and  
 267 *circSry* KO mice spermatocytes (\*\* $p < 0.01$ ; unpaired, two tailed t test,  $n=5$ ) (F) Representative image of western blot  
 268 results of  $\gamma\text{H2AX}$  in control and *circSry* KO mice spermatocytes ( $n=3$ ). (G and H) Immunofluorescence staining of SYCP3  
 269 (red) and  $\gamma\text{H2AX}$  (green) or SYCP1 (green) in control and *circSry* KO spermatocytes at early pachytene stage. Arrowhead  
 270 indicates the Y chromosome; arrow indicates the X chromosome. Scale bars indicate 100 $\mu\text{m}$ . (I)The proportion of  
 271 leptotene, zygotene, pachytene and diplotene spermatocytes from control or *circSry* KO mice testes .The data are  
 272 presented as the mean  $\pm$  s.e.m.

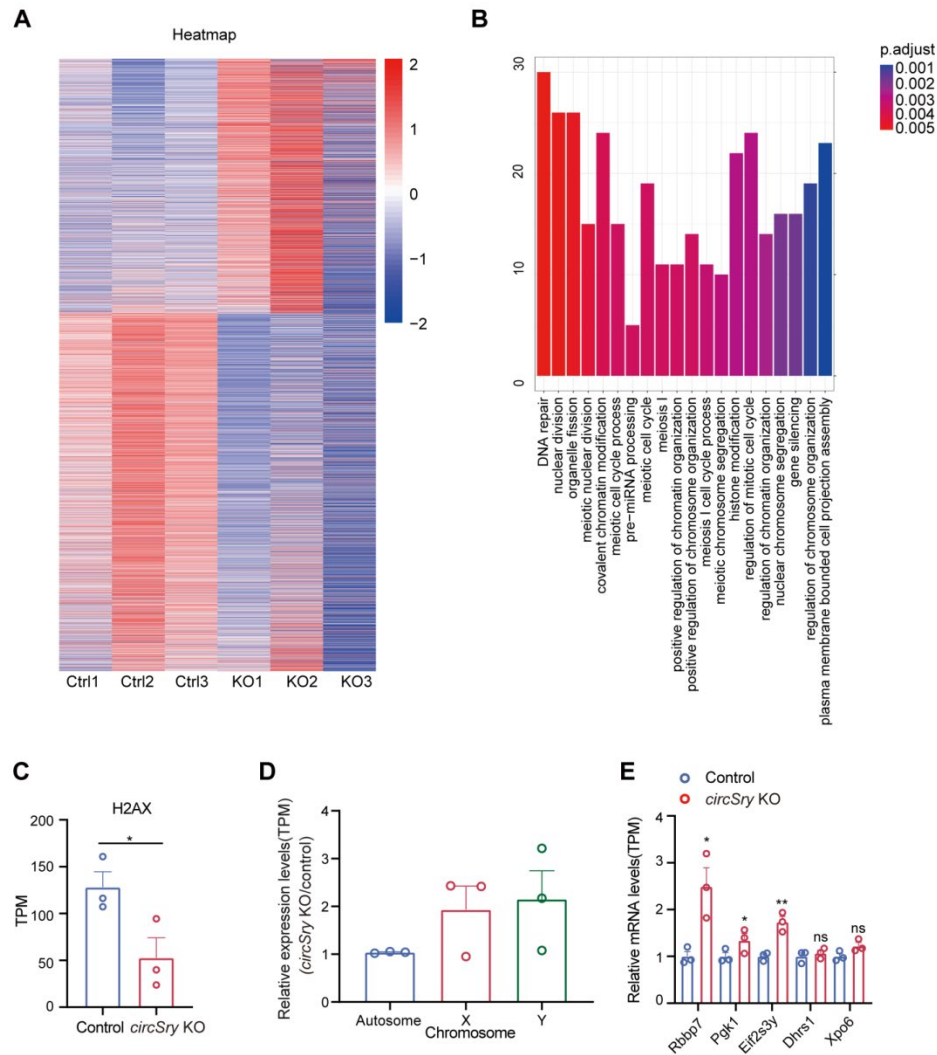

273

274 **Figure 4 figure supplement 2. RNA-seq analysis between *circSry* KO and control primary spermatocytes (related**  
 275 **to Figure 4).** (A) Heat map illustrates RNA-seq differential expression data. Red, positive fold-change (logFC) indicates  
 276 higher expression; blue, negative logFC. Total RNA was extracted from primary spermatocytes of control or *circSry* KO  
 277 mice. (B) Enrichment analysis of significant down regulation comparing with control mice, FDR<0.05, logFC<-1. (C) H2AX



278 expression comparing with control and *circSry* KO spermatocytes (\* $p < 0.05$ , t test,  $n = 3$ ). (D) Relative gene expression  
279 levels on chromosomes as determined by RNA-seq ( $n = 3$ ). (E) Relative expression of X-linked genes, *Rbby7*, *Pgk1*; Y-  
280 linked genes, *Eif2s3y*; and genes on autosome, *Xpo6*, *Dhrs1*, as determined by RNA-seq analysis on control and *circSry*  
281 KO spermatocytes (\*\* $p < 0.01$ , \* $p < 0.05$ , ns, not significant;  $n = 3$ ). The data are presented as the mean  $\pm$  s.e.m.

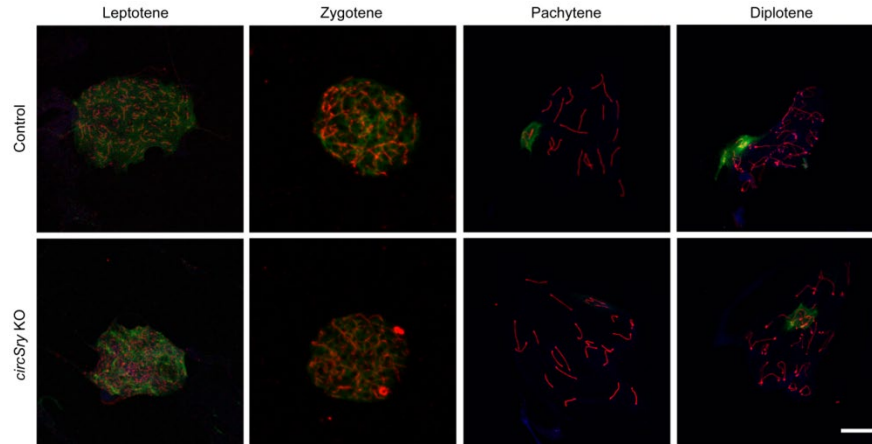

282  
283

284 **Figure 4 figure supplement 3. Staining SYCP3 (red) and  $\gamma$ H2AX (green) in control and *circSry* KO spermatocytes**  
285 **from leptotene to diplotene stages (related to Figure 4).** (Up) Representative image of immunofluorescence staining of  
286 SYCP3 (red),  $\gamma$ H2AX (green) and DAPI (blue) in 8-week old control or *circSry* KO mice testes (Down). Scale bars indicate  
287 10  $\mu$ m. (Two tailed t test, \*\*\* $p < 0.001$ , ns, not significant). Total 400 cells (300 cells of pachytene stage, 100 cells of the  
288 other stages) were counted from 3 mice.

### 289 ***CircSry* regulates $\gamma$ H2AX expression via sponging miR138-5p**

290 Since cytoplasmic circRNAs could act as miRNA sponge to regulate gene expression indirectly,  
291 we predicted potential miRNAs that interacted with *circSry* using web tool miRDB (30, 31). 33  
292 miRNAs were predicted to potentially interact with *circSry*, 6 of which had more than 7 binding  
293 sites on *circSry*, including well characterized miR-138-5p (Figure 5A and Table S1) (13). To  
294 validate these miRNAs using luciferase assay, we constructed reporter plasmid by inserting  
295 *circSry* sequence into the 3'UTR of luciferase coding sequence. Compared with scramble miRNA,  
296 miR-138-5p, miR-323-5p, and miR-683 reduced the luciferase signals to the greatest extent  
297 (Figure 5B). Furthermore, among these miRNAs, miR-138-5p was the most abundantly  
298 expressed in mouse male germ cells based on published miRNA sequencing data (32, 33).  
299 Therefore, we hypothesized that *circSry* regulated histone H2AX by sequestering miR-138-5p.

300 To test whether *circSry* binds AGO2-miR-138-5p complex, we performed AGO2  
301 immunoprecipitation on isolated spermatocytes. *CircSry* was specifically enriched in AGO2  
302 immunoprecipitates (Figure 5 figure supplement 1A), indicating that *circSry* interacts with miRNAs.  
303 Next, we performed RNA-RNA pull down experiment to examine the interaction between miR-  
304 138-5p and *circSry* in 293T cell line that highly expressed *circSry* (Figure 5 figure supplement 1B).  
305 This cell line was established by transducing a lentiviral vector harboring the *circSry* expressing  
306 cassette. The splicing site of *circSry* was also confirmed by Sanger sequencing (Figure 5 figure  
307 supplement 1C). Pull down experiment showed that *circSry* biotinylated probe significantly  
308 enriched the miR138-5p compared to the scramble probe (Figure 5C), and biotin-coupled miR-  
309 138-5p captured more *circSry* than the biotin control miRNA (Figure 5D). Furthermore, RNA-RNA  
310 pull down in spermatocytes showed that *circSry* probe captured more miR-138-5p than scramble  
311 probe as well (Figure 5E). Taken together, these results suggest that *circSry* acts as a sponge for  
312 miR-138-5p.

313 It has been reported that miR-138-5p directly down regulates H2AX expression through  
314 binding to 3'UTR region of H2AX mRNA (Figure 5F), inducing chromosomal instability during  
315 DNA damage repair (34). To test our hypothesis that *circSry* regulates H2AX expression via  
316 sponging miR-138-5p during spermatogenesis, we conducted luciferase reporter experiments.  
317 Transfection of luciferase reporter containing H2AX sequence together with miR-138-5p mimics  
318 showed significantly reduced luciferase signal, while co-transfection of *circSry* rescued the  
319 decrease of luciferase signal (Figure 5G).

320 Taken together, these results show that *circSry* regulates the expression of H2AX mRNA at  
321 post-transcriptional level by sponging miR-138-5p and contributes to MSCI during  
322 spermatogenesis.

323

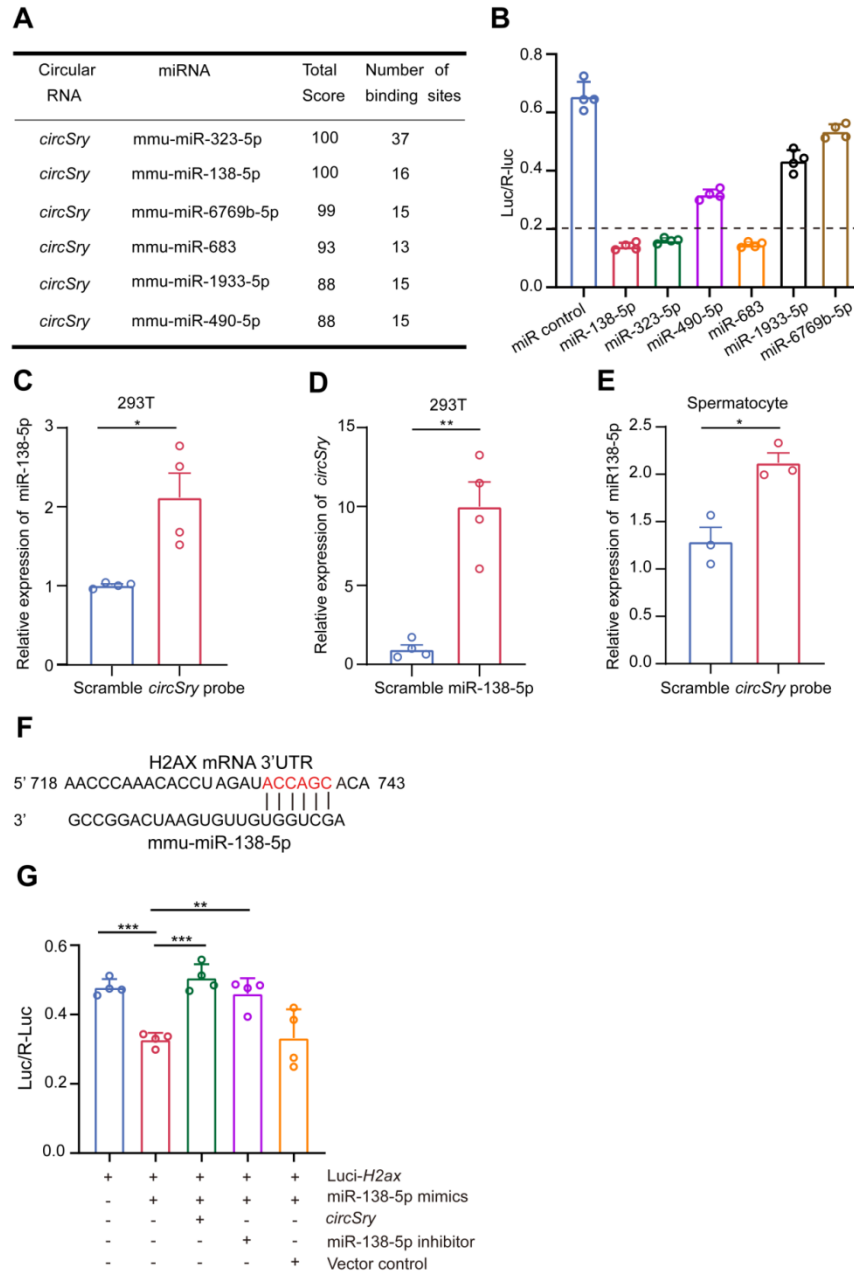

324  
325 **Figure 5. *CircSry* enhances  $\gamma$ H2AX expression by sponging miR138-5p in spermatocytes.** (A) Table of 6 miRNAs  
326 that have more than 7 potential binding sites for *circSry*. (B) Luciferase reporter assay showing diverse binding capacities  
327 of 6 miRNAs on Luc-Sry (n=4) (C) RNA-RNA pull down enrichment of miR-138-5p using *circSry* biotinylated probe or  
328 scramble probe in 293T cell line. (\*p<0.05; unpaired, two tailed t test, n=4). (D) RNA-RNA pull down enrichment of *circSry*  
329 using biotin-coupled miR-138-5p in 293T cell line. (\*\*p<0.01; unpaired, two tailed t test, n=4) . (E) Expression level of  
330 miR-138-5p pulled down by *circSry* biotinylated probe or scramble probe in spermatocytes (\*p < 0.05, unpaired, two tailed  
331 t test n=4). (F) A putative binding site between miR-138-5p and H2AX mRNA 3'UTR. (G) Luciferase reporter assay of  
332 *circSry* on sponging miR-138-5p. MiR-138-5p inhibitor and empty vector were used as positive and negative control,  
333 separately (\*\*p<0.01, \*\*\*p<0.001; unpaired, two tailed t test; n=4). The data are presented as the mean  $\pm$  s.e.m.

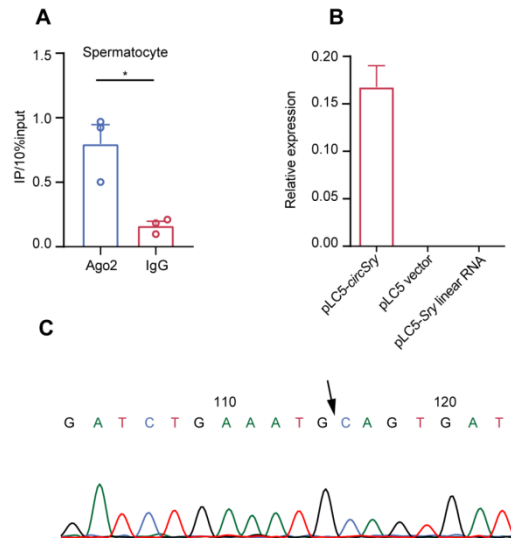

**Figure 5 figure supplement 1. Overexpression of *circSry* in 293T cell line (related to Figure 5).** (A) RIP results showing the *circSry* enrichment using AGO2 antibody vs IgG antibody *in vivo* (\* $p < 0.05$ ; unpaired, two tailed t test,  $n=3$ ). (B) Relative expression of *circSry* and *Sry* linear RNA were measured with 293T cells line that expressed *circSry*. (C) Sanger sequencing showed junction sequence of *circSry* (Arrow indicates the junction site). The data are presented as the mean  $\pm$  s.e.m.

## Discussion

Recent studies have identified thousands of circular RNAs and many of them have important biological functions in various tissues and organs. Here we show that a circular transcript exhibits regulatory function in male reproductive system. Even more interesting, this circular RNA originates from the sex-determining gene *Sry*, which initiates the male germ cell development in the first place. In this study, we show that loss of *circSry* led to defective spermatogenesis, specifically causing primary spermatocytes apoptosis. Deletion of *circSry* decreased the expression of H2AX and displayed aberrant XY synapsis at pachytene stage, followed by MSCI abolishment. Given that miR-138-5p directly targets H2AX mRNA (34), we performed RNA-RNA pull down experiment and luciferase reporter assay, demonstrating that *circSry* enhanced H2AX expression by sequestering miR-138-5p.

354 Mouse *Sry* gene is capable of producing linear RNAs at embryonic stage as well as circular  
355 transcripts in adult testis. It was proposed that *circSry* is generated from a linear RNA precursor  
356 containing long palindromic repeats, which is transcribed from a distal promoter (35). How does  
357 the transcription of *Sry* differentially regulated in embryonic genital ridge and adult male germs  
358 cells is poorly understood. This mechanism of alternative promoter choice and upstream  
359 regulation is an interesting direction of future study.

360 In addition to *Mus musculus*, transcripts of *Sry* were also detected in the testes of *Mus*  
361 *musculus domesticus* and *Mus spretus*. Considering that splicing donor site was also conserved  
362 in *Rattus norvegicus* (21), we speculated that alternative splicing occurred in rat as well. Do these  
363 transcripts form circular RNA, and do they regulate spermatogenesis need to be further explored.  
364 *CircSry* was also expressed in the mouse brain during embryonic stage and its expression was  
365 diminished after birth (36). Whether *circSry* plays a role in mouse brain needs further  
366 investigation.

367 Human *SRY* is also expressed in adult testis. Different from the circular transcript in adult  
368 mouse testis, however, human *SRY* transcript is linear and polyadenylated (37), and the presence  
369 of circular *SRY* has not been reported. The function of human *SRY* transcript in adult testes is  
370 very curious and the elucidation of which may help us to better understand male development  
371 and spermatogenesis in human. While human *SRY* transcript in testes might regulate germ cell  
372 development using a different mechanism, the sex determining gene also plays a role in adult  
373 testes could be a common theme in multiple mammalian species.

374 Taken together, our study complements *Sry*'s role in germ cell development, revealing its  
375 significance in male germ cell development. *CircSry* safeguards the inactivation of sex  
376 chromosomes during pachytene stage, the key process to complete meiosis and produce  
377 sperms. Upon fertilization, the sperm carrying Y chromosome contributes Y to the embryo which  
378 will develop into a male and grow testicles. The cycle of *Sry* expression and dual forms and  
379 functions suggests a mechanism to ensure the preservation of vulnerable Y chromosome in  
380 evolution.

381

## 382 **Materials and Methods**

383

### 384 **Animals**

385 The mice used in this research were C57BL/6 background. All animals were maintained at 24°C  
386 and 50–60% humidity under a 12:12 h light/dark cycles and with ad libitum access to food and  
387 water. *Sry*<sup>fl<sup>ox</sup></sup> mice were generated in Jackson Laboratory. *Stra8-Cre* and *Amh-Cre* mice were  
388 provided by Prof. Gao of Institute of Zoology, University of Chinese Academy of Sciences. All  
389 mice studies were carried out in accordance with the principles approved by the Institutional  
390 Animal Care and Use Committee at the Institute of Zoology, Chinese Academy of Sciences.

### 391 **Establishment of mutant mice by CRISPR/Cas9-based genome editing**

392 *CircSry* knockout mice were established by microinjection of Cas9 mRNA and single-guide RNAs  
393 (sgRNAs) into zygotes (38). All RNAs prepared for microinjection were in vitro transcribed. Briefly,  
394 Cas9 mRNAs and sgRNAs were mixed properly and injected into zygotes. The injected embryos  
395 were transferred to pseudopregnant females. To genotype mutant mouse lines, genomic  
396 sequence was amplified by PCR, followed by Sanger sequencing. All oligonucleotides were listed  
397 in the Table S2.

### 398 **Establishment of *Sry*<sup>fl<sup>ox</sup></sup> mice by CRISPR/Cas9 system**

399 We used single-stranded oligodeoxynucleotides (ssODN) to establish knock-in mouse mutants  
400 (38). Establishment of *Sry*<sup>fl<sup>ox</sup></sup> KI mice went through two rounds of microinjections. The first  
401 microinjection contained Cas9 mRNA and ssODN (V5-loxP) targeted the 3' end of *Sry* exon 1 (V5-  
402 TGA-loxP). The injected embryos were transferred to pseudopregnant females. The correct male  
403 mouse line was determined by Sanger sequencing of genomic sequence. Sperms from *Sry*-V5-  
404 loxP male mouse line were collected for single-sperm microinjection of wild-type oocytes. The  
405 second microinjection contained Cas9 mRNA and ssODN (5'-loxP) targeted the 5' upstream site  
406 of *Sry* exon1 start codon within the *Sry*-V5-loxP zygotes. The correct mouse line was again

407 confirmed by Sanger sequencing of genomic sequence. All oligonucleotides and primers  
408 sequences were listed in the Table S2.

#### 409 **Genotyping of mice and sexing**

410 All mice were genotyped with the tail DNA. Chromosomal sex was detected through amplifying  
411 the Y-linked gene *Uty*. Phenotypic sex was determined by examination of external genitalia, and  
412 the presence /absence of mammary glands. Primers were listed in Table S2.

#### 413 **RNA preparation and real-time PCR**

414 Nuclear and cytoplasmic RNAs were extracted by using Norgen's Cytoplasmic & Nuclear RNA  
415 Purification Kit (Norgen Biotek Corp.). RNAs were extracted using Trizol reagent (Life  
416 Technologies). cDNAs were synthesized using the Hifair III 1<sup>st</sup> strand cDNA synthesis reagent  
417 (Yeasen company, China) with 500ng of total RNA. cDNAs were amplified with Hieff qPCR SYBR  
418 Green Master mix (Yeasen company, China) and quantified with Roche LightCycle 480 system.  
419 For RNase R treatment, experiment was performed by incubation of 3 µg of RNA with 6U µg<sup>-1</sup> of  
420 RNase R (Epicenter) for 25 minutes at 37°C. The expression levels of each gene were presented  
421 relative to GAPDH or U6 expression. The primers sequences were listed in Table S2.

#### 422 **RNA pull-down**

423 Biotinylated *circSry* probe and 5'bio-miRNA mimic were synthesized by RiboBio (Guangzhou,  
424 China). Testes were ground and incubated in lysis buffer [50 mM Tris-HCl, pH 7.4, 150 mM NaCl,  
425 2 mM MgCl<sub>2</sub>, 1% NP40, RNase Inhibitor (Beyotime biotechnology)] on ice for 1 hour. The lysates  
426 were then incubated with the biotinylated probes at RT for 4 hours; followed by adding  
427 streptavidin C1 magnetic beads (Invitrogen) were to binding reaction, and continued to incubate  
428 at 4°C , overnight. On second day, the beads were washed briefly with wash buffer [0.1% SDS, 1%  
429 Triton X-100, 2 mM EDTA, 20 mM Tris-HCl, and 500 mM NaCl] five times. The bound RNA in the

430 pull-down was further extracted for purification and RT-qPCR. The sequence of *circSry* probe  
431 was shown in Table S3.

#### 432 **RNA-binding protein immunoprecipitation**

433 RIP experiments were performed with primary spermatocytes which separated from adult mice  
434 testes and homogenized into a single-cell suspension in ice-cold PBS. After centrifugation, the  
435 pellet was resuspended in RIP lysis buffer. Magnetic beads were incubated with 5 µg antibody  
436 against AGO2 (Proteintech Inc), or IgG at RT. The tissue lysates were then incubated with the  
437 bead-antibody complexes overnight at 4°C. RNAs were extracted by Trizol reagent and reverse-  
438 transcribed after proteinase K treatment.

#### 439 **RNA-seq and data analysis**

440 RNA sequencing reads were aligned to mouse reference sequence GRCm39 using STAR  
441 (2.7.0f). Read counts and TPM (Transcripts Per Kilobase Million) were counted using RSEM  
442 (1.3.2). Differential expression genes (DEG) (FDR < 0.05, log<sub>2</sub> (fold change) (log<sub>2</sub> FC) ≥ 1 or ≤  
443 -1) were calculated by edgeR (3.28.1) package. The DEG genes were carried out Gene  
444 Ontology Pathway analysis and Kyoto Encyclopedia of Genes and Genomes analysis by  
445 clusterProfiler (3.14.3) and org.Hs.eg.db (3.10.0) packages. Heatmap (1.0.12) was used for the  
446 heatmap visualization; colors represent the Z-score derived from the log<sub>2</sub> transformed FPKM  
447 data. Principal Component Analysis (PCA) was performed by R packages, including tidyr (1.1.2),  
448 dplyr (1.0.2) and ggplot2 (3.3.2).

#### 449 **Construction of *circSry* expression vector**

450 The empty vector was purchased from Genesee Bio (Guangzhou,China), termed pLC5.This  
451 plasmid was linearized with XhoI-BamHI. Complete *circSry* sequence was amplified with XhoI-  
452 BamHI clone site and inserted into pLC5.The final plasmid was named pLC5-*circSry*. After  
453 sequencing, pLC5-*circSry* was transfected into 293T cell line to testify the expression of *circSry*.



454 **Dual-luciferase reporter assay**

455 The full-length sequence of *circSry* or the 3'UTR of H2AX was inserted into the 3' UTR of pMIR-  
456 Report Luciferase vector (gifted by Yu Wang lab, State Key Laboratory of Stem Cell and  
457 Reproductive Biology, Institute of Zoology, Chinese Academy of Sciences, Beijing). Co-  
458 transfection of 500 ng pMIR-Report luciferase vector, miRNA mimic (RiboBio) and pLC5-*circSry*  
459 were conducted using lipofectamine 2000 (Invitrogen). After 48 hours, the luciferase activities  
460 were measured using a dual-luciferase reporter assay kit (Promega). The results were  
461 normalized to the ratio between Firefly signal and Renilla signal.

462 **Western blotting**

463 Protein obtained from spermatocytes were separated by gel electrophoresis SDS-PAGE and  
464 transferred to a PVDF membrane. The PVDF membrane was incubated with primary antibodies  
465 against  $\gamma$ H2AX (Millipore; 05-636, 1:200),  $\beta$  tubulin (Yeasten company, China; 1:1000) 4°C  
466 overnight and horseradish peroxidase-labeled secondary antibody for 1 hour at 37°C  
467 subsequently. Images were captured using ECL Western Blotting Substrate (Thermo Scientific  
468 Pierce).

469 **Tunel assays**

470 The TUNEL assay was performed by TUNEL BrightRed Apoptosis Detection Kit (Vazyme). Briefly;  
471 sections were permeabilized by protein K and labeled with rTdT reaction mix for 1 hour at 37°C.  
472 Reaction was stopped by 1× PBS. After washing in PBS, the sections were incubated in 2  $\mu$ g/ml  
473 of DAPI (Molecular Probes, D1306) for 10 minutes. Sections were mounted on slides with Dako  
474 Fluorescence Mounting Medium (Dako Canada, ON, Canada). Images were obtained using a  
475 laser scanning confocal microscope LSM780 (Carl Zeiss).

476 **Flow cytometry**

477 The cell suspensions obtained from testes were digested by collagenase IV and Trypsin for 5  
478 minutes (39). To analyse DNA ploidy, the cells were incubated with the Hoechst for 15 minutes  
479 and filtered before being subjected to flow cytometry. The results were analysed using a FACS-  
480 Calibur system (BD Biosciences).

#### 481 **Sperm count and fertility**

482 The epididymis tail of the mouse was taken out, cut into pieces with ophthalmic scissors, placed  
483 in a 37°C water bath for 15 minutes, and counted via microscope. 2-3-month-old *circSry* and  
484 control C57BL/6J male mice were housed with control C57BL/6J males (2–3-month-old), which  
485 were proved having normal fecundity. Copulatory plugs were monitored daily, and plugged  
486 females with visibly growing abdomen were moved to separate cages for monitoring pregnancy.  
487 The mating process lasted for 4 months. The numbers of pups (both alive and dead) were  
488 counted on the first day of life.

#### 489 **Tissue collection and histological analysis**

490 Testes from control and *circSry* KO mouse were dissected immediately after euthanasia, then  
491 immediately fixed in 4% paraformaldehyde (PFA) for 24 hours, after storing in 70% ethanol and  
492 embedding in paraffin, 5 µm-thick sections were prepared using a rotary microtome (Leica) and  
493 mounted on glass slides. Sections were stained with MVH (Abcam) for histological analysis.

#### 494 **Immunofluorescence analysis**

495 After deparaffinization and antigen retrieval, 5% bovine serum was used to block sections at room  
496 temperature (RT) for 1 hour, and specific primary antibody was used to incubate with sections at  
497 RT or overnight at 4°C. After washing the sections for three times, the slides were incubated with  
498 the corresponding secondary antibody, fluorescent dye-conjugated-FITC or TRITC (1:150,  
499 Jackson) for 1 hour at RT (Avoiding the light). DAPI was used to stain the nucleus. All images  
500 were captured with a confocal microscopy (Leica TCS SP8). All the antibodies were listed in the  
501 methods and materials.

## 502 **Preparation of synaptonemal complex**

503 Seminiferous tubules were collected from dissecting testes and washed with 1× PBS. Hypo  
504 extraction buffer (HEB) was used to incubate within seminiferous tubules for 30 minutes, followed  
505 by disrupting within 0.1 M sucrose liquid to form a single-cell suspension. The cell suspension  
506 was mounted on slides treated with 1% PFA. Slides were air-dried in a humidified box for at least  
507 6 hours. After washing with 0.04% Photo-Flo (Equil, 1464510), the slides were staining for SYCP3.  
508 Incubating with SYCP3 antibody was conducted at RT for 30 minutes after antibody dilution buffer  
509 (ADB) treatment. After washing three times in 1× Tris buffer, saline (TBS), blocking was  
510 conducted with 1× ADB at 4°C overnight. After washing three times with cold 1× TBS buffer,  
511 corresponding secondary antibody, and fluorescent dye-conjugated-TRITC were incubated with  
512 sections for 3 hours at 37°C. All images were captured with a confocal laser scanning microscope  
513 (Leica TCS SP8).

## 514 **Data and statistical analysis**

515 All images were processed with Photoshop CS6 (Adobe). All statistics were analyzed using Prism  
516 software (GraphPad Software). All experiments were confirmed with at least three independent  
517 experiments, and three to five control or mutant testes were used for immunostaining. The  
518 quantitative results were presented as the mean ± s.e.m. The significant difference was evaluated  
519 with t-test. P-value < 0.05 was considered as significant.

## 520 **Data availability**

521 RNA sequencing-derived data reported in this study have been deposited in NCBI's Gene Expression  
522 Omnibus (GEO) under accession number GSE185184. Reviewers go to GEO with the link:  
523 <https://www.ncbi.nlm.nih.gov/geo/query/acc.cgi?acc=GSE185184>. A private token is provided for reviewers  
524 to check the records: sditsmkadvqvfqh.  
525 Source data is provided as Supplementary file2.

## 526 **Acknowledgments**

527 We are grateful to Chenrui An for their comments and editing of the manuscript; and all members of Fei Gao  
528 laboratory for technical support. This work was supported by National Key Research and Development  
529 Program of China (2019YFA0110000, 2018YFE0201102, 2018YFA0107703 and 2016YFA0101402),  
530 Strategic Priority Research Program of the Chinese Academy of Sciences (XDA16010503) Strategic  
531 Collaborative Research Program of the Ferring Institute of Reproductive Medicine, Ferring Pharmaceuticals,  
532 Chinese Academy of Sciences (FIRMD181101), National Natural Science Foundation of China (31722036  
533 and 81773269).

534

535 **Competing Interest Statement:** The authors declare no competing interests.

536

## 537 **References**

- 538 1. Kapranov P, *et al.* RNA maps reveal new RNA classes and a possible function for pervasive  
539 transcription. *Science* 316:1484-1488(2007).
- 540 2. Taylor DH, Chu ET, Spektor R, & Soloway PD Long non-coding RNA regulation of reproduction and  
541 development. *Molecular reproduction and development* 82:932-956(2015).
- 542 3. Qu S, *et al.* Circular RNA: A new star of noncoding RNAs. *Cancer letters* 365:141-148(2015).
- 543 4. Memczak S, *et al.* Circular RNAs are a large class of animal RNAs with regulatory potency. *Nature*  
544 495:333-338(2013).
- 545 5. Sanger HL, Klotz G, Riesner D, Gross HJ, & Kleinschmidt AK Viroids are single-stranded covalently  
546 closed circular RNA molecules existing as highly base-paired rod-like structures. *Proceedings of*  
547 *the National Academy of Sciences of the United States of America* 73:3852-3856(1976).
- 548 6. Salzman J, Gawad C, Wang PL, Lacayo N, & Brown PO Circular RNAs are the predominant  
549 transcript isoform from hundreds of human genes in diverse cell types. *PloS one* 7:e30733(2012).
- 550 7. Li Z, *et al.* Exon-intron circular RNAs regulate transcription in the nucleus. *Nature structural &*  
551 *molecular biology* 22:256-264(2015).
- 552 8. Liu Y, *et al.* Back-spliced RNA from retrotransposon binds to centromere and regulates  
553 centromeric chromatin loops in maize. *PLoS biology* 18:e3000582(2020).
- 554 9. Guarnerio J, *et al.* Intragenic antagonistic roles of protein and circRNA in tumorigenesis. *Cell*  
555 *research* 29:628-640(2019).
- 556 10. Conn VM, *et al.* A circRNA from SEPALLATA3 regulates splicing of its cognate mRNA through R-  
557 loop formation. *Nature plants* 3:17053(2017).
- 558 11. Panda AC, *et al.* Novel RNA-binding activity of MYF5 enhances Ccnd1/Cyclin D1 mRNA translation  
559 during myogenesis. *Nucleic acids research* 44:2393-2408(2016).
- 560 12. Hentze MW & Preiss T Circular RNAs: splicing's enigma variations. *The EMBO journal* 32:923-  
561 925(2013).
- 562 13. Hansen TB, *et al.* Natural RNA circles function as efficient microRNA sponges. *Nature* 495:384-  
563 388(2013).
- 564 14. Salmena L, Poliseno L, Tay Y, Kats L, & Pandolfi PP A ceRNA hypothesis: the Rosetta Stone of a  
565 hidden RNA language? *Cell* 146:353-358(2011).
- 566 15. Poliseno L, *et al.* A coding-independent function of gene and pseudogene mRNAs regulates  
567 tumour biology. *Nature* 465:1033-1038(2010).
- 568 16. Koopman P, Munsterberg A, Capel B, Vivian N, & Lovell-Badge R Expression of a candidate sex-  
569 determining gene during mouse testis differentiation. *Nature* 348:450-452(1990).
- 570 17. Koopman P, Gubbay J, Vivian N, Goodfellow P, & Lovell-Badge R Male development of

- 571 chromosomally female mice transgenic for Sry. *Nature* 351:117-121(1991).
- 572 18. Wang H, *et al.* TALEN-mediated editing of the mouse Y chromosome. *Nature biotechnology*  
573 31:530-532(2013).
- 574 19. Kato T, *et al.* Production of Sry knockout mouse using TALEN via oocyte injection. *Scientific*  
575 *reports* 3:3136(2013).
- 576 20. Hawkins JR Mutational analysis of SRY in XY females. *Human mutation* 2:347-350(1993).
- 577 21. Miyawaki S, *et al.* The mouse Sry locus harbors a cryptic exon that is essential for male sex  
578 determination. *Science* 370:121-124(2020).
- 579 22. Hacker A, Capel B, Goodfellow P, & Lovell-Badge R Expression of Sry, the mouse sex determining  
580 gene. *Development* 121:1603-1614(1995).
- 581 23. Dubin RA, Kazmi MA, & Ostrer H Inverted repeats are necessary for circularization of the mouse  
582 testis Sry transcript. *Gene* 167:245-248(1995).
- 583 24. Capel B, *et al.* Circular transcripts of the testis-determining gene Sry in adult mouse testis. *Cell*  
584 73:1019-1030(1993).
- 585 25. Fernandez-Capetillo O, *et al.* H2AX is required for chromatin remodeling and inactivation of sex  
586 chromosomes in male mouse meiosis. *Dev. Cell* 4:497-508(2003).
- 587 26. Celeste A, *et al.* Genomic instability in mice lacking histone H2AX. *Science* 296:922-927(2002).
- 588 27. Namekawa SH, *et al.* Postmeiotic sex chromatin in the male germline of mice. *Current biology : CB*  
589 16:660-667(2006).
- 590 28. Odorasio T, Mahadevaiah SK, McCarrey JR, & Burgoyne PS Transcriptional analysis of the  
591 candidate spermatogenesis gene Ube1y and of the closely related Ube1x shows that they are  
592 coexpressed in spermatogonia and spermatids but are repressed in pachytene spermatocytes.  
593 *Developmental biology* 180:336-343(1996).
- 594 29. Royo H, *et al.* Evidence that meiotic sex chromosome inactivation is essential for male fertility.  
595 *Current biology : CB* 20:2117-2123(2010).
- 596 30. Liu W & Wang X Prediction of functional microRNA targets by integrative modeling of microRNA  
597 binding and target expression data. *Genome biology* 20:18(2019).
- 598 31. Chen Y & Wang X miRDB: an online database for prediction of functional microRNA targets.  
599 *Nucleic acids research* 48:D127-D131(2020).
- 600 32. Chiang HR, *et al.* Mammalian microRNAs: experimental evaluation of novel and previously  
601 annotated genes. *Genes & development* 24:992-1009(2010).
- 602 33. Chen J, *et al.* MicroRNA-202 maintains spermatogonial stem cells by inhibiting cell cycle  
603 regulators and RNA binding proteins. *Nucleic acids research* 45:4142-4157(2017).
- 604 34. Wang Y, *et al.* MicroRNA-138 modulates DNA damage response by repressing histone H2AX  
605 expression. *Molecular cancer research : MCR* 9:1100-1111(2011).
- 606 35. Dolci S, Grimaldi P, Geremia R, Pesce M, & Rossi P Identification of a promoter region generating  
607 Sry circular transcripts both in germ cells from male adult mice and in male mouse embryonal  
608 gonads. *Biology of reproduction* 57:1128-1135(1997).
- 609 36. Mayer A, Mosler G, Just W, Pilgrim C, & Reisert I Developmental profile of Sry transcripts in  
610 mouse brain. *Neurogenetics* 3:25-30(2000).
- 611 37. Sinclair AH, *et al.* A gene from the human sex-determining region encodes a protein with  
612 homology to a conserved DNA-binding motif. *Nature* 346:240-244(1990).
- 613 38. Qin W, *et al.* Generating Mouse Models Using CRISPR-Cas9-Mediated Genome Editing. *Current*  
614 *protocols in mouse biology* 6:39-66(2016).
- 615 39. Gaysinskaya V, Soh IY, van der Heijden GW, & Bortvin A Optimized flow cytometry isolation of  
616 murine spermatocytes. *Cytometry. Part A : the journal of the International Society for Analytical*  
617 *Cytology* 85:556-565(2014).

618

619

620 **Table S1. Predicted miRNAs that bind *circSry***

| Circ Name      | miRNA            | Score | Binding Sites count | Positions                                                                                                                                                      |
|----------------|------------------|-------|---------------------|----------------------------------------------------------------------------------------------------------------------------------------------------------------|
| <i>circSry</i> | mmu-miR-323-5p   | 100   | 37                  | 573,576,602,606,653,657,683,687,713,717,720,723,726,749,753,779,824,828,854,858,861,864,890,920,950,980,1010,1014,1017,1049,1053,1079,1083,1109,1113,1139,1143 |
| <i>circSry</i> | mmu-miR-138-5p   | 100   | 16                  | 483, 578, 608, 659, 689, 755, 782, 830, 893, 923, 1019, 1055, 1085,1115, 1145, 1194                                                                            |
| <i>circSry</i> | mmu-miR-6769b-5p | 99    | 15                  | 577, 607, 658, 688, 727, 754, 781, 829, 892, 922, 1018, 1054, 1084, 1114, 1144                                                                                 |
| <i>circSry</i> | mmu-miR-3098-3p  | 97    | 7                   | 176, 662, 833, 959, 1028, 1058, 1088                                                                                                                           |
| <i>circSry</i> | mmu-miR-683      | 93    | 13                  | 176, 589, 662, 700, 766, 833, 871, 959, 997, 1028, 1058, 1088, 1126                                                                                            |
| <i>circSry</i> | mmu-miR-485-5p   | 86    | 1                   | 326                                                                                                                                                            |
| <i>circSry</i> | mmu-miR-1962     | 89    | 1                   | 326                                                                                                                                                            |
| <i>circSry</i> | mmu-miR-1933-5p  | 88    | 15                  | 649, 709, 745, 775, 820, 850, 886, 916, 946, 976, 1006, 1045, 1075, 1105, 1135                                                                                 |
| <i>circSry</i> | mmu-miR-490-5p   | 88    | 15                  | 648, 708, 744, 774, 819, 849, 885, 915, 945, 975, 1005, 1044, 1074, 1104, 1134                                                                                 |
| <i>circSry</i> | mmu-miR-1903     | 87    | 1                   | 59                                                                                                                                                             |
| <i>circSry</i> | mmu-miR-12183-5p | 87    | 1                   | 59                                                                                                                                                             |
| <i>circSry</i> | mmu-miR-6908-5p  | 85    | 1                   | 441                                                                                                                                                            |
| <i>circSry</i> | mmu-miR-7063-3p  | 82    | 1                   | 97                                                                                                                                                             |
| <i>circSry</i> | mmu-miR-6973b-3p | 82    | 1                   | 97                                                                                                                                                             |
| <i>circSry</i> | mmu-miR-1904     | 81    | 7                   | 177, 663, 834, 960, 1029, 1059, 1089                                                                                                                           |
| <i>circSry</i> | mmu-miR-7021-3p  | 80    | 4                   | 200, 276, 296, 351                                                                                                                                             |
| <i>circSry</i> | mmu-miR-93-3p    | 77    | 7                   | 176, 662, 833, 959, 1028, 1058, 1088                                                                                                                           |
| <i>circSry</i> | mmu-miR-7011-3p  | 75    | 6                   | 667, 838, 964, 1033, 1063, 1093                                                                                                                                |
| <i>circSry</i> | mmu-miR-3078-3p  | 75    | 5                   | 174, 185, 484, 957, 987                                                                                                                                        |
| <i>circSry</i> | mmu-let-7a-2-3p  | 73    | 1                   | 395                                                                                                                                                            |
| <i>circSry</i> | mmu-miR-7035-5p  | 70    | 4                   | 174, 184, 957, 987                                                                                                                                             |
| <i>circSry</i> | mmu-miR-7662-5p  | 70    | 1                   | 26                                                                                                                                                             |
| <i>circSry</i> | mmu-miR-7079-5p  | 70    | 1                   | 26                                                                                                                                                             |
| <i>circSry</i> | mmu-miR-7028-5p  | 70    | 1                   | 26                                                                                                                                                             |
| <i>circSry</i> | mmu-miR-6911-5p  | 70    | 1                   | 26                                                                                                                                                             |
| <i>circSry</i> | mmu-miR-367-5p   | 67    | 5                   | 586, 697, 763, 994, 1123                                                                                                                                       |
| <i>circSry</i> | mmu-miR-103-2-5p | 61    | 6                   | 666, 837, 963, 1032, 1062, 1092                                                                                                                                |
| <i>circSry</i> | mmu-miR-103-1-5p | 61    | 6                   | 666, 837, 963, 1032, 1062, 1092                                                                                                                                |
| <i>circSry</i> | mmu-miR-107-5p   | 56    | 6                   | 666, 837, 963, 1032, 1062, 1092                                                                                                                                |

|                |                  |    |   |          |
|----------------|------------------|----|---|----------|
| <i>circSry</i> | mmu-miR-3970     | 56 | 1 | 399      |
| <i>circSry</i> | mmu-miR-12184-5p | 54 | 1 | 190      |
| <i>circSry</i> | mmu-miR-7656-3p  | 50 | 2 | 371, 503 |
| <i>circSry</i> | mmu-miR-6896-3p  | 50 | 1 | 300      |

621
